# Supplementary material
Source: PubMed Central journal article supplement (PMC4851465)
Supplement: NIHMS750662-supplement-3.pdf [file NIHMS750662-supplement-3.pdf]

Figure S1

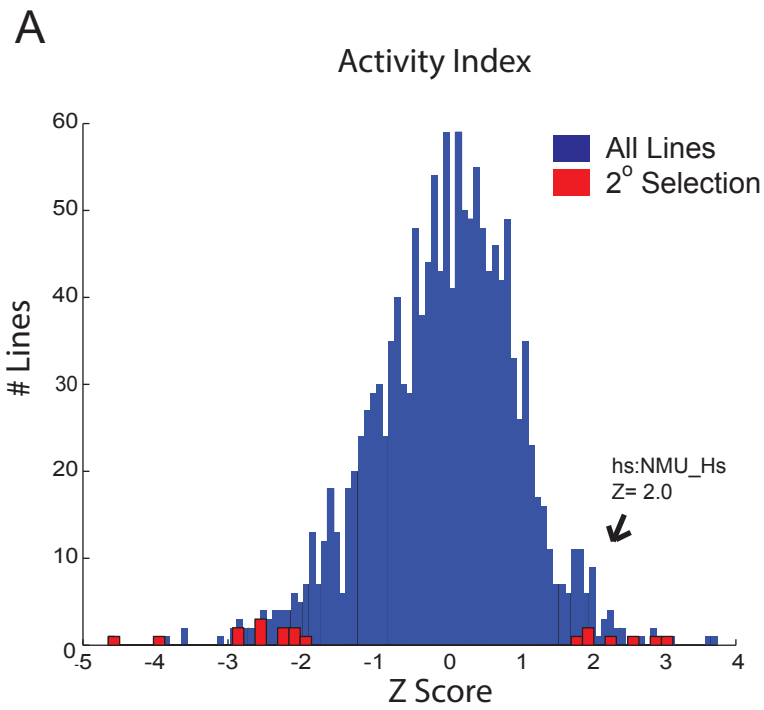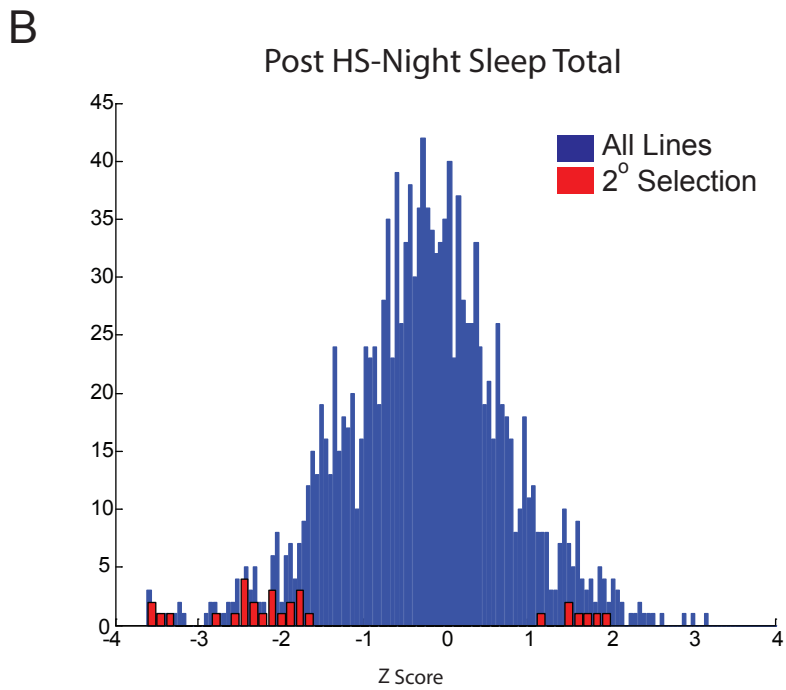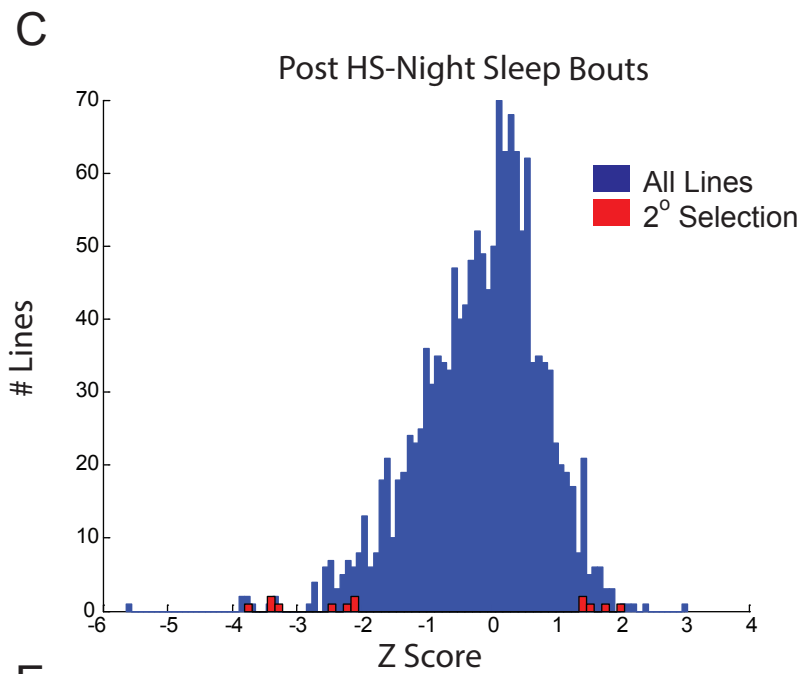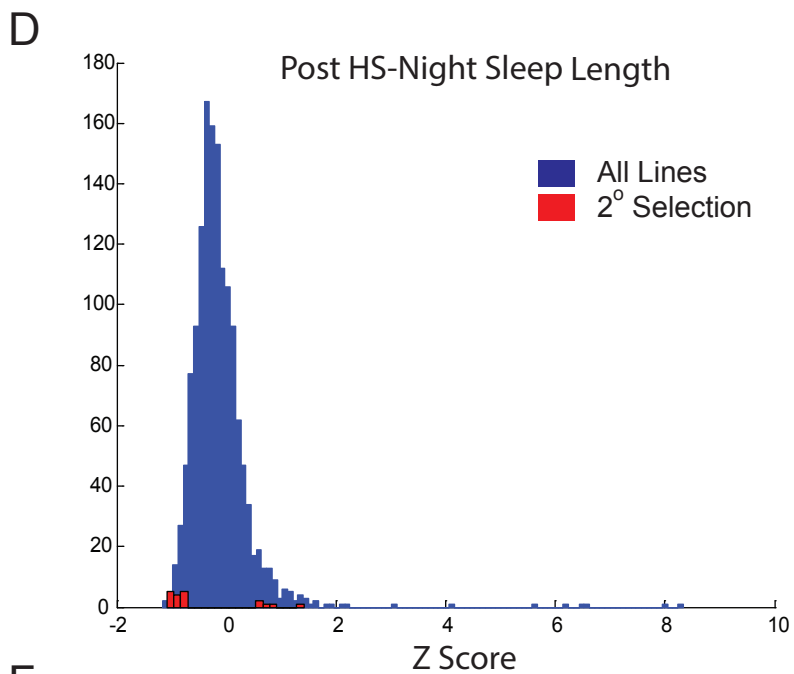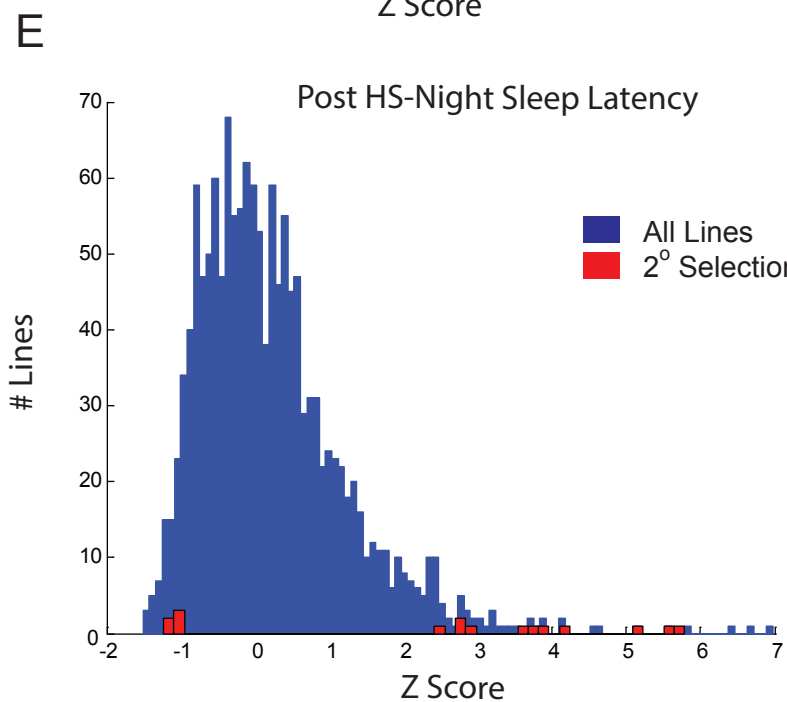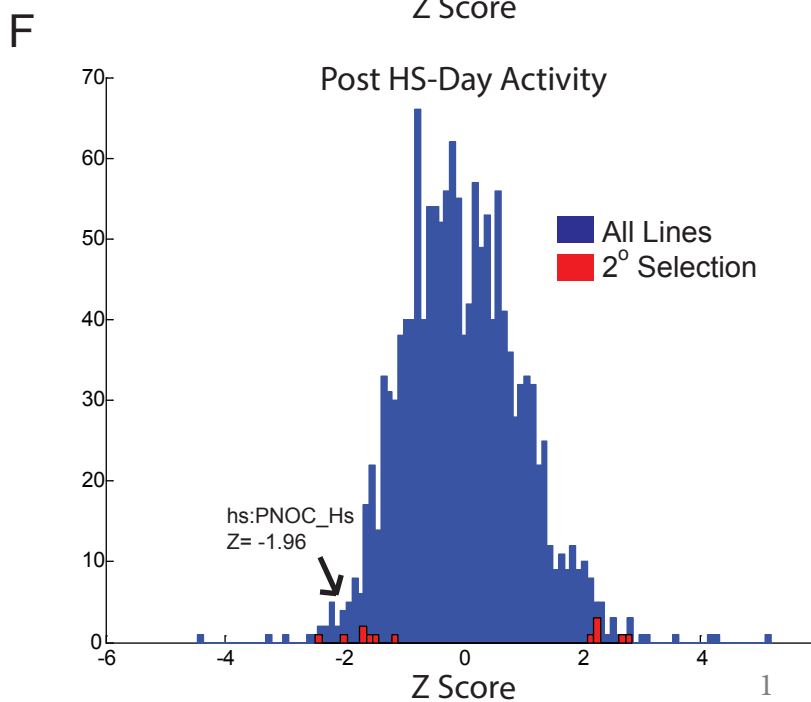

Figure S2

**A**

```

Nmu_Dr      ATGAGGAACAGCAATCAATGTGAACGCGCAACCGCTCACAGCGCGATGAGCCCGGGAAACACCTCCGCCCTGATGCTCGC 80
Nmu_Dr d4   ATGAGGAACAGCAATCAATGTGAACGCGCAACCGCTCACAGCGCGATGAGCCCGGGAAACACCTCCGCCCT----CTCGC 76

Nmu_Dr      GG TACTACTCCTCTCCTTCA TACCCATCACCACAAGTGTCCGATGCTCTTGAATCCATCTTCACTAGAGCATGAGCAGC 160
Nmu_Dr d4   GG TACTACTCCTCTCCTTCA TACCCATCACCACAAGTGTCCGATGCTCTTGAATCCATCTTCACTAGAGCATGAGCAGC 156

Nmu_Dr      TACTAACCCAGATAACTGATTTGTGTTTCATTTCTACCTCTCCGCAGACCCGTCCTTTTGAACATCTGACGTCCTGGAGGAC 240
Nmu_Dr d4   TACTAACCCAGATAACTGATTTGTGTTTCATTTCTACCTCTCCGCAGACCCGTCCTTTTGAACATCTGACGTCCTGGAGGAC 236

Nmu_Dr      CTGTGTTTTCTAATGCTGGGATCACTGCAAAAATCGAAGGAGATCACAGCTCGAGAGACTAGCAAAAAGGTTTTTATTTC 320
Nmu_Dr d4   CTGTGTTTTCTAATGCTGGGATCACTGCAAAAATCGAAGGAGATCACAGCTCGAGAGACTAGCAAAAAGGTTTTTATTTC 316

Nmu_Dr      TTACTACTAAACCAAACGGGGCAGGATTGTCTGATGGGACGCTTACTGTGTTGCACCCTCTTCTGGAGCTCATACCCCAGC 400
Nmu_Dr d4   TTACTACTAAACCAAACGGGGCAGGATTGTCTGATGGGACGCTTACTGTGTTGCACCCTCTTCTGGAGCTCATACCCCAGC 396

Nmu_Dr      TTGCCAGAAGAAGAAGCAGGAGAATGAAATTAATGAGAACC'TTCAAGGTCCGGGACGCATCCAGAGCAGAGGATACTTC 480
Nmu_Dr d4   TTGCCAGAAGAAGAAGCAGGAGAATGAAATTAATGAGAACC'TTCAAGGTCCGGGACGCATCCAGAGCAGAGGATACTTC 476

Nmu_Dr      CTTTATCGGCCAAGAAATGGAAGAAGATCTGATGAGTATGTGTAA 525
Nmu_Dr d4   CTTTATCGGCCAAGAAATGGAAGAAGATCTGATGAGTATGTGTAA 521
    
```

**B**

```

Nmu_Hs      MLRTESECRPRSPAGOVAAA--SPLLLLLLLLLLAWCAGACRGAPIL-POGLOPEOOLQWLNEIDDTCSFSLIDSPOASNALEELCFMIM 86
Nmu_Mm      MSRAAGHRPGLSAGOLAAATASPLLSLLLLLACCADACKGVPIIS-PORLOPEOELQWLNEIHEACASFLSIDSRPOASVALRELCRIVM 88
Nmu_Dr      MRNSNOCERATAHSAMSPGNTSALMLAVLLLSFIPITTSAPMLLNPSLEHEQ---LLTQITDLCSEFYLSADPSFRSTSVDLEDLCLML 86
Nmu_Dr d4   MRNSNOCERATAHSAMSPGNTSALSRYYSPPSYSPQVLRCS 42

Nmu_Hs      GMLPKPQEQDEKDNTRKFLFHYSKTOKLKGKSNVSVSVVHPLLQLVPHLHERRMKRFRVDEEFQSPFASQSRGYFLFRPRNGRRSAGFI 174
Nmu_Mm      EISOKPQEQSEKDNTRKFLFHYSKTOKLGNVSVSVVHPLLQLVPHLHERRMKRFRKA--EYQSPVVGOSKGYFLFRPRNGKRSTSEFI 174
Nmu_Dr      GSLOKSRKITARETSKRFLFHYTKPNGAGLSDGTSVIVHPLLELIPOLARRSRMMLKLNENLQGPGRIQSRGYFLFRPRNGRRSDEYV 174
Nmu_Dr d4   42
    
```

**C**

```

Nmurla_Dr   ATGGAGATTGAAGACTTCTGCCTTGACCAAGACGAGTATCTGGAGAAATACCTCGGGCCAAGACGATCCCAGTGTTCCTGCCTGTAT 88
Nmurla_Dr i11 ATGGAGATTGAAGACTTCTGCCTTGACCAAGACGAGTATCTGGAGAAATACCTCGGGCCAAGACGATCCCAGTGTTCCTGCCTGTAT 88

Nmurla_Dr   GCCTGACCTACCTCCTGATCTTCCGTGGTGGGAGCGGTGGGAAACATCCTTACCTGCATTGTGTCATTGCTAAAAACAAAGTCATGCGGAC 176
Nmurla_Dr i11 GCCTGACCTACCTCCTGATCTTCCGTGGTGGGAGCGGTGGGAAACATCCTTACCTGCATTGTGTCATTGCTAAAAACAAAGTCATGCGGAC 176

Nmurla_Dr   GCCGACCAACTTCTACCTGTTTACGCTTGCCATTTTACAGATCTTCTAGTGCTTCTCCTGGGAATGCCTTTGGAGCTTTATGAAATGTGG 264
Nmurla_Dr i11 GCCGACCAACTTCTACCTGTTTACGCTTGCCATTTTACAGATCTTCTAGTGCTTCTCCTGGGAATGCCTTTGGAGCTTTATGAAATGTGG 264

Nmurla_Dr   AGCAACTATCCGTTCCCTTTTAGGCAAGGGCGGTTGTTACTTCAAGACTCTTCTCTTCGAGACTGTTTGCTTTGCGTCGATCTTGAACG 352
Nmurla_Dr i11 AGCAACTATCCGTTCCCTTTTAGGCAAGGGCGGTTGTTACTTCAAGACTCTTCTCTTCGAGACTGTTTGCTTTGCGTCGATCTTGAACG 352

Nmurla_Dr   TAACTGCTTTGAGCGTTGAACGCTACATTGCTGTGATTCACCCACTCCGAGCCAAATACGTAGTAACCCGCACTCATGCAAAGCGCCT 440
Nmurla_Dr i11 TAACTGCTTTGAGCGTTGAACGCTACATTGCTGTGATTCACCCACTCCGAGCCAAATACGTAGTAACCCGCACTCATGCAAAGCGCCT 440

Nmurla_Dr   GATATTGAGCGTCTGGAGCATTTCGGTGTCTTTGCGCCATTCCCAACAGATCCTCCACGGTATATTTACTCTCCCGCTCCTAAAGGG 528
Nmurla_Dr i11 GATATTGAGCGTCTGGAGCATTTCGGTGTCTTTGCGCCATTCCCAACAGATCCTCCACGGTATATTTACTCTCCCGCTCCTAAAGGG 528

Nmurla_Dr   AAAGCAGCAGGAGTCATGCTCGACTCCGCCACATGCATGCTCGTGAACCGCGTGGATGTACAACCTGATCATCAAATCAGACTC 616
Nmurla_Dr i11 AAAGCAGCAGGAGTCATGCTCGACTCCGCCACATGCATGCTCGTGAACCGCGTGGATGTACAACCTGATCATCAAATCAGACTC 616

Nmurla_Dr   TGCTATTCTTCTGTTGCCATGTTGACCATCAGCGTTTTGTATCTGCTCATCGGCATGCAGCTGAAGCGGGAGAAGATGCTGCAGGT 704
Nmurla_Dr i11 TGCTATTCTTCTGTTGCCATGTTGACCATCAGCGTTTTGTATCTGCTCATCGGCATGCAGCTGAAGCGGGAGAAGATGCTGCAGGT 704

Nmurla_Dr   CCTGGAGGCCAAAGCCAGTTCGGGCTTGACAGCTCATTAATGTGCGCAGTCAGCAGCAGAAAACCCGTCGCCAGCAGGTGACCAAG 792
Nmurla_Dr i11 CCTGGAGGCCAAAGCCAGTTCGGGCTTGACAGCTCATTAATGTGCGCAGTCAGCAGCAGAAAACCCGTCGCCAGCAGGTGACCAAG 792

Nmurla_Dr   ATGTTGTTGTTTTGGTGGTGTGTTCCGGCATCTGCTGGGCTCCGTTT CACACCGACCG-----CCTGATGTGGAGCTTCAT 869
Nmurla_Dr i11 ATGTTGTTGTTTTGGTGGTGTGTTCCGGCATCTGCTGGGCTCCGTTT CACACCGACCGGTTTCGCTAGCTCCGATGTGGAGCTTCAT 880

Nmurla_Dr   GGATCAGAAGGACAGCGAGCACATCGAGATCTTTGAGGTCTACGAGTACGTCCACGTCATCTCCGGGTCTTTTTCTACCTGAGCTCG 957
Nmurla_Dr i11 GGATCAGAAGGACAGCGAGCACATCGAGATCTTTGAGGTCTACGAGTACGTCCACGTCATCTCCGGGTCTTTTTCTACCTGAGCTCG 968

Nmurla_Dr   GCCATAAACCCCGTCTCTACAATCTGATGTCCACCCGCTTCAGGGAGATGTTCAAAGAGGTGATGTGCCACCATAAATGGCGTCCCG 1045
Nmurla_Dr i11 GCCATAAACCCCGTCTCTACAATCTGATGTCCACCCGCTTCAGGGAGATGTTCAAAGAGGTGATGTGCCACCATAAATGGCGTCCCG 1056

Nmurla_Dr   TCCCAGAAAAGCGCTCTCTGAGCATGACCAGAGTACCCTTCGAGCAGCCGTCAGTGACGTCGCCCATGCAACGGCACTGTGACTAT 1133
Nmurla_Dr i11 TCCCAGAAAAGCGCTCTCTGAGCATGACCAGAGTACCCTTCGAGCAGCCGTCAGTGACGTCGCCCATGCAACGGCACTGTGACTAT 1144

Nmurla_Dr   TGAAGGAGACGATTATGACGTGGATGAAGGTCAAGAAAATAAGACATGTCCCTAA 1188
Nmurla_Dr i11 TGAAGGAGACGATTATGACGTGGATGAAGGTCAAGAAAATAAGACATGTCCCTAA 1199
    
```

Figure S2

D

Nmur1b\_Dr ATGATACAGTACAACCTGCTCCTCTCCAAGTTCACGTTCACAGTTGTTGTGAACACGTCATGGTGCCTCCACCAAAAGAAAGAAGATGT 87  
 Nmur1b\_Dr d5 ATGATACAGTACAACCTGCTCCTCTCCAAGTTCACGTTCACAGTTGTTGTGAACACGTCATGGTGCCTCCACCA-----GAAGAATGT 82

Nmur1b\_Dr CAAAACAGAACAGCAAACCTATCAGACCTCTGTCTATCCCGCAGTGCCTACCTGGAGAAATACCTTGGACCCTGTCGTTACCTTTTC 174  
 Nmur1b\_Dr d5 CAAAACAGAACAGCAAACCTATCAGACCTCTGTCTATCCCGCAGTGCCTACCTGGAGAAATACCTTGGACCCTGTCGTTACCTTTTC 169

Nmur1b\_Dr TTTCTGCCTATATGTGTACCTACCTGCTCATCTTTGTAGTAGGTGTGGTGGGCAACATCCTAACTTGTATGTTCATTACCCGTCAT 261  
 Nmur1b\_Dr d5 TTTCTGCCTATATGTGTACCTACCTGCTCATCTTTGTAGTAGGTGTGGTGGGCAACATCCTAACTTGTATGTTCATTACCCGTCAT 256

Nmur1b\_Dr CGCATCATGCGCACAACGACAAACTACTACCTGTTTACGCTGGCCATTTCTGACCTCCTTGTGCTGTTGCTTGGCCTCCCGCTGGAG 348  
 Nmur1b\_Dr d5 CGCATCATGCGCACAACGACAAACTACTACCTGTTTACGCTGGCCATTTCTGACCTCCTTGTGCTGTTGCTTGGCCTCCCGCTGGAG 343

Nmur1b\_Dr CTTTATGAGCTCTGGAGCAACTATCCTTTTCTGTTTGAATTTCTGGCTGCTACTTCAAACCTGTCTCTTTGAGACAGTCTGCTTT 435  
 Nmur1b\_Dr d5 CTTTATGAGCTCTGGAGCAACTATCCTTTTCTGTTTGAATTTCTGGCTGCTACTTCAAACCTGTCTCTTTGAGACAGTCTGCTTT 430

Nmur1b\_Dr GCCTCTGTTCTCAATGTTACAGCCTTAAGTGCAGAACGTTATAGAGTATCATTTCATCCTCTGCACACCAAACATGTTGCGACGAGT 522  
 Nmur1b\_Dr d5 GCCTCTGTTCTCAATGTTACAGCCTTAAGTGCAGAACGTTATAGAGTATCATTTCATCCTCTGCACACCAAACATGTTGCGACGAGT 517

Nmur1b\_Dr GTCATGCAAAGCGTGTATCCTTGTGTTATGGGCTGTCTCTCTATTGTGTGCCTTGCCCAATACCAGTATTCATGGTGTGGAGATG 609  
 Nmur1b\_Dr d5 GTCATGCAAAGCGTGTATCCTTGTGTTATGGGCTGTCTCTCTATTGTGTGCCTTGCCCAATACCAGTATTCATGGTGTGGAGATG 604

Nmur1b\_Dr TTTAAACCCCGTTTGGACTTACTTTCCCGAGAATCAGGTGTGTGTACAGTGGTACACGATAGGTGGATCTACAACCTGCTGGTGCAA 696  
 Nmur1b\_Dr d5 TTTAAACCCCGTTTGGACTTACTTTCCCGAGAATCAGGTGTGTGTACAGTGGTACACGATAGGTGGATCTACAACCTGCTGGTGCAA 691

Nmur1b\_Dr GTGACAGCACTGCTGTTCTTTCATACTGCCGATGCTGACTATCAGTGTGCTGTATGTGCTGATTGGCCTACAGCTGCACCCGGAAAGG 783  
 Nmur1b\_Dr d5 GTGACAGCACTGCTGTTCTTTCATACTGCCGATGCTGACTATCAGTGTGCTGTATGTGCTGATTGGCCTACAGCTGCACCCGGAAAGG 778

Nmur1b\_Dr GAGTGCTTTGATTCAAAGATCGTGTCAATCAGGATGGGGTCAATCAGAGGGCACGTCATCGACAAGTCACAAAAATGCTTTGTGCA 870  
 Nmur1b\_Dr d5 GAGTGCTTTGATTCAAAGATCGTGTCAATCAGGATGGGGTCAATCAGAGGGCACGTCATCGACAAGTCACAAAAATGCTTTGTGCA 865

Nmur1b\_Dr TTGGTGATTGTGTTTGAATCTGCTGGGCTCCCTTTACATTGATCGTGAATGTGGAGCTATATTGATGACTGGACTGCAGAGAAC 957  
 Nmur1b\_Dr d5 TTGGTGATTGTGTTTGAATCTGCTGGGCTCCCTTTACATTGATCGTGAATGTGGAGCTATATTGATGACTGGACTGCAGAGAAC 952

Nmur1b\_Dr CACCACATCTTTGAGTATGTGCATCTTCTATCTGGTGTCTTCTTCTACTTGAGCTCAGTGGTCAATCCCATCCTGTATAACCTCATG 1044  
 Nmur1b\_Dr d5 CACCACATCTTTGAGTATGTGCATCTTCTATCTGGTGTCTTCTTCTACTTGAGCTCAGTGGTCAATCCCATCCTGTATAACCTCATG 1039

Nmur1b\_Dr TCTTCGCGCTTCAGAGAAATGTTCCGTTAGGTTGGTGTGTCAAAGACCATCGTCAGCTCTCAATGAGTAGGGTACATTACGTAGT 1131  
 Nmur1b\_Dr d5 TCTTCGCGCTTCAGAGAAATGTTCCGTTAGGTTGGTGTGTCAAAGACCATCGTCAGCTCTCAATGAGTAGGGTACATTACGTAGT 1126

Nmur1b\_Dr GTTGTCTTCTGCCTCTTTTTCTGCCTCCAATACAGTCTCATTTTTCTGTAAAGTTCAACCCAGTGAGCTGCCACACACACTC 1212  
 Nmur1b\_Dr d5 GTTGTCTTCTGCCTCTTTTTCTGCCTCCAATACAGTCTCATTTTTCTGTAAAGTTCAACCCAGTGAGCTGCCACACACACTC 1207

E

Nmur1\_Hs **MTPLCLNCSVLPDLYPGGARNPMACNGSAA**-----**RGHFDPEDLNLTDEALRLKYLGPQOQTELFMPICATYLLIFVVGAVGNLTCIVI** 85  
 Nmur1\_Mm **MV**-----**CNISEF**-----**KWPYQPEDLNLTDEALRLKYLGPQOMKQFVPICVTYLLIFVVGTIINGLTCIVI** 62  
 Nmur1a\_Dr **M**-----**ETEDFCLDQDEYLEKYLGPRRSPVELFVCLTYLLIFVVGAVNLTCTIVI** 51  
 Nmur1a\_Dr i11 **M**-----**ETEDFCLDQDEYLEKYLGPRRSPVELFVCLTYLLIFVVGAVNLTCTIVI** 51  
 Nmur1b\_Dr **MIQY--NCS--SSLF**FTVVNTSW-**CSTKEE**CQNRTANLS**DLCLSRSA**YLE**KYLG**CRSP**FELPICV**TYLLIFVVG**VGN**LTCTIVI 84  
 Nmur1b\_Dr d5 **MIQY--NCS--SSLF**FTVVNTSW-**CSTRMS**KQNSKPIRPLS**IPQCL**PEIPWLS**F**FLSAYM**CHLPAHCSR**CGQHPN**LYCH**YP 84

Nmur1\_Hs **LRHKAMRTPNYFLFSLAVSDLLVLLVGLPLELYEMWHNYPFLGVGGCYFRLLFEMVCLASVLNVTALSVERYVAVVHPLQARSMV** 173  
 Nmur1\_Mm **LRNKTMRTPNYFLFSLAVSDMLVLLVGLPLELYEMQONYPFLGLGASACYFRLLLETVCLASVLNVTALSVERYVAVVRPLQAKSVM** 150  
 Nmur1a\_Dr **AKNKVMRTPNYFLFSLAISDLLVLLGLPLELYEMWSNYPFLGKGGCYFRLLFFETVCFASLNVLTALSVERYIAVIHPIRAKYVV** 139  
 Nmur1a\_Dr i11 **AKNKVMRTPNYFLFSLAISDLLVLLGLPLELYELWSNYPFLGKGGCYFRLLFFETVCFASLNVLTALSVERYIAVIHPIRAKYVV** 139  
 Nmur1b\_Dr **TRHRIMRTPNYFLFSLAISDLLVLLGLPLELYELWSNYPFLGKGGCYFRLLFFETVCFASVLNVTALSVERYIAVIHPIHTKHVA** 172  
 Nmur1b\_Dr d5 **SSHHAHNDKLLPVQPGHF** 102

Nmur1\_Hs **TRAHVRRVLGAVWGLAMLCSLPNTSLHGIRQLHVP**---**CRGPV**PDSAV**CMLVRPRALYNM**VVQ**T**ALL**FFCLPMA**IMSVLYLL**IGLRL** 258  
 Nmur1\_Mm **TRAHVRRMVGATWVLAIFSLPNTSLHGLSOLTVP**---**CRGPV**PDSAT**CSLVG**EMDFY**KLVVLT**TALL**FFCLPM**VTVISVLYLL**IGLRL** 235  
 Nmur1a\_Dr **TRTHAKRLILSVMSISVLCATPNTILHGIFLPPPKGKAAGVMDSATCMLVKPRWYINLIICITLLFFLLPMLTISVLYLLIGMQL** 227  
 Nmur1a\_Dr i11 **TRTHAKRLILSVMSISVLCATPNTILHGIFLPPPKGKAAGVMDSATCMLVKPRWYINLIICITLLFFLLPMLTISVLYLLIGMQL** 227  
 Nmur1b\_Dr **TSAAHAKRVLIVLWAVSLLCALPNTSLHGIVEMIKPRFGLT**---**F**ES**GC**V**TVV**HD**RWIY**NLI**IQV**TALL**FFLLPMLTISVLYLLIGLQI** 257  
 Nmur1b\_Dr d5 102

Nmur1\_Hs **RRERLLMQEAKGRGSAAARSRYTCRLOQHDRGRROVTKMLFVLVVVFGICWAPFHADRVMSVV**-**SOWT**DGLHL-**AF**OHVH**VISGI** 343  
 Nmur1\_Mm **RRERMLLOVEVKGKRTAATQETSHRRIQLODRGRROVTKMLFALVVVFGICWAPFHADRVMSVTVYGHSTEGHL**-**AY**QCVH**IASGI** 321  
 Nmur1a\_Dr **KREKMLQVLEAKA--SSGLDSSSNVRSQQQKTRRQOVTKMLFVLVVVFGICWAPFHDRMLMSFMDQDKSEHIEIFEVEYEVHVISGV** 313  
 Nmur1a\_Dr i11 **KREKMLQVLEAKA--SSGLDSSSNVRSQQQKTRRQOVTKMLFVLVVVFGICWAPFHDRFR** 286  
 Nmur1b\_Dr **HRER--ECFDSKI--VLN**QDGVN-----**Q**RAR**H**ROV**TKMLCAL**VIV**FGICWAPFHIDRV**MMS**Y**IDD**WTA**ENH**EIFE**---**YV**HL**LSGV** 332  
 Nmur1b\_Dr d5 102

Nmur1\_Hs **FFYLGSAAANPVLYSLMSSRFRETFQEAALCLGA**-**C**CH**RLR**PR**SHSL**SR**MT**T**GGSTL**CD**VGS**LG**SV**W**HPLAGN**-**D**G**PEA**Q**Q**ET**DP**S 426  
 Nmur1\_Mm **FFYLGSAAANPVLYSLMSTRFRETFQCALCLGCTQCCRRROPVHGSHNHIRLTGGSTLCDVCHRN**S**RDE**PLAVN**-ED**PG**Q**Q**ET**DP**S 405  
 Nmur1a\_Dr **FFYLSSAANPVLYNLMS**TR**FRE**ME**KE**V**MC**HHK**---**WR**P**V**PR**KRS**LS**MT**RV**V**RS**TV**SD**V**PP**CNGT**V**T**IE**GDDY**V**V**DE**G**EN**K**TC**P** 395  
 Nmur1a\_Dr i11 286  
 Nmur1b\_Dr **FFYLS**SV**NP**IL**YN**LM**SS**RF**RE**ME**RE**V**V**C**Q**KD-----**H**R**Q**LS**MS**RV**IL**RS**V**VS**S**AS**S**AS**N**TV**SF**-**S**V**K**F**N**PRE**L**P**H**TL 404  
 Nmur1b\_Dr d5 102****

Figure S2

**F**

```

Nmur2_Dr      ATGATGGCCCTGATCTGCCTTTGCGAGTCTGTGAATACATCAGACCAGGATTATGAGTTCTGCAACAGCAGTACGTTCAACTTCACTGG 89
Nmur2_Dr d17  ATGATGGCCCTGATCTGCCTTTGCGAGTCTGTGAATACATCAGACCAGGATTATGAGTTCTGCAACAGCAGTACGTTCAACTTCACTGG 89

Nmur2_Dr      AAATGACAGTGCACACTGTACCTTCAGACCATTGATGAAGTTCGTGTTAAGCTTCTGGGCCCAAGACGATCTCCGTTCTTCTTCCTG 178
Nmur2_Dr d17  AAATGACAGTGCACACTGTACCTTCAGACCATTGATGAAGTTCGTGTTAAGCTTCTGGGCCCAAGACGATCTCCGTTCTTCTTCCTG 178

Nmur2_Dr      TAACCTGTACTTACATCCTCATCTTCATGACCGGGGTCTTAGGAAACCTCCTGACCTGCGCTGTAATCACTAAAGATCGAAAAATGCAA 267
Nmur2_Dr d17  TAACCTGTACTTACATCCTCATCTTCATGACCGGGGTCTTAGGAAACCTCCTGACCTGCGCTGTAATCACTAAAGATCGAAAAATGCAA 267

Nmur2_Dr      ACTCCACCAACTTGTATCTCTTTAGCCTGGCCATCTCCGATCTTCTAGTGCTACTCTTCGGGATGCCTCTGGAAATCTACGAACCTTG 356
Nmur2_Dr d17  ACTCCACCAACTTGTATCTCTTTAGCCTGGCCATCTCCGATCTTCTAGTGCTACTCTTCGGGATGCCTCTGGAAATCTACGAACCTTG 339

Nmur2_Dr      GCAAAACTACCCTTTTCCCTTCGGCGAGAGCATCTGCTGCTTTAAATCTTCTTGTTCGAAACAGTTTGTCTTTCCTGTTTAAACG 445
Nmur2_Dr d17  GCAAAACTACCCTTTTCCCTTCGGCGAGAGCATCTGCTGCTTTAAATCTTCTTGTTCGAAACAGTTTGTCTTTCCTGTTTAAACG 428

Nmur2_Dr      TCACAGTGTAAAGTGTGGAGCGATACATAGCTGTGATTCACCCGCTCAAACCCGTTACGCCATCACCAACAAGCACGCTCGAAGGGTC 534
Nmur2_Dr d17  TCACAGTGTAAAGTGTGGAGCGATACATAGCTGTGATTCACCCGCTCAAACCCGTTACGCCATCACCAACAAGCACGCTCGAAGGGTC 517

Nmur2_Dr      ATCGCTGGGGTTTGGGCTATGTCTCTGCTCTGCGCCGTCGGAACACCTCCCTCCATGGCCTGCAGTATCAGTATCTGCCGGAGAGGGT 623
Nmur2_Dr d17  ATCGCTGGGGTTTGGGCTATGTCTCTGCTCTGCGCCGTCGGAACACCTCCCTCCATGGCCTGCAGTATCAGTATCTGCCGGAGAGGGT 606

Nmur2_Dr      TCAGGAATCGGCTACCTGCAACCTGCTCAAGCCCAAATGGATGTACAACCTGGTGTATCCAGATCACAACTGTGCTTCTTACTTTGTTC 712
Nmur2_Dr d17  TCAGGAATCGGCTACCTGCAACCTGCTCAAGCCCAAATGGATGTACAACCTGGTGTATCCAGATCACAACTGTGCTTCTTACTTTGTTC 695

Nmur2_Dr      CCATGATGATGATCAGCGTGTGTATCTGATGATCGGTCTGACGCTTGGCAGAGGGCAGAAGCAGAAAAAGGACAAGCTGGGAAGCAAT 801
Nmur2_Dr d17  CCATGATGATGATCAGCGTGTGTATCTGATGATCGGTCTGACGCTTGGCAGAGGGCAGAAGCAGAAAAAGGACAAGCTGGGAAGCAAT 784

Nmur2_Dr      CACAGCAACGACAGCTGGAAAATCCATCTGGACAGCAGACGGAGAAGGCAGGTACCAAGATGCACCTTGTGGTGGTATTAGTGTTTGC 890
Nmur2_Dr d17  CACAGCAACGACAGCTGGAAAATCCATCTGGACAGCAGACGGAGAAGGCAGGTACCAAGATGCACCTTGTGGTGGTATTAGTGTTTGC 873

Nmur2_Dr      CATCTGCTGGGCTCCGTTCCACATCGACCGGCTCTTATGGAGCTTCATCACCAGTTGGACAGACCACATGCATAACATCTTTGAATATG 979
Nmur2_Dr d17  CATCTGCTGGGCTCCGTTCCACATCGACCGGCTCTTATGGAGCTTCATCACCAGTTGGACAGACCACATGCATAACATCTTTGAATATG 962

Nmur2_Dr      TGCACATAATCTCCGGCGTCTTCTACCTCAGTTCAGCTGTAAACCCATAATCTACAACCTGCTTTCAGCCGCTTCCGGGAACGG 1068
Nmur2_Dr d17  TGCACATAATCTCCGGCGTCTTCTACCTCAGTTCAGCTGTAAACCCATAATCTACAACCTGCTTTCAGCCGCTTCCGGGAACGG 1051

Nmur2_Dr      TTTCAAGCGTGGTGTGCAGTCGCTGTCAACTAGATCCTCACGTAATGATTCCATGCCTTTTTTACATCATACCCAAAGACCCCGAC 1157
Nmur2_Dr d17  TTTCAAGCGTGGTGTGCAGTCGCTGTCAACTAGATCCTCACGTAATGATTCCATGCCTTTTTTACATCATACCCAAAGACCCCGAC 1140

Nmur2_Dr      TGATTTCAAACGGACTGGA 1176
Nmur2_Dr d17  TGATTTCAAACGGACTGGA 1159
    
```

**G**

```

Nmur2_Hs      MSGM---EKLONA-----SWIYQOKLEDPFQKHLNSTEYLAFLCGPRRSHFFLPVSVVYVPIFVVGVIGNVLVCLVLIHQAMK 77
Nmur2_Mm      MG-----KLENA-----SWI-----HSLMKYLNSTEYLAFLCGLPKRSDLSPVSVVYALIFVVGVIGNVLVCLVLIARHCTLK 69
Nmur2_Dr      MMALICLCESVNTSDQDYEFCSSTFNFTGNDSAHCYLOTIDEVLFKLLGPRRSPFFFPVCTYIILFMTGVLGNLITCAVITKDRKMO 89
Nmur2_Dr d17  MMALICLCESVNTSDQDYEFCSSTFNFTGNDSAHCYLOTIDEVLFKLLGPRRSPFFFPVCTYIILFMTGVLGNLITCAVITKDRKMO 89

Nmur2_Hs      TPTNYLFLSLAVSDLLVLLLGMPLVEYEMWRNYPFLFGPVGCYFKTALFETVCFASILSITTVSVERYVAILHPFRAKLOSTRRALRI 166
Nmur2_Mm      TPTNYLFLSLAVSDLLVLLLGMPLVEYELWENYPFLFGPVGCYFKTALFETVCFASILSVTTSVERYVAIVHPFRAKLESTRRALRI 158
Nmur2_Dr      TPTNLYLFLSLAVSDLLVLLFGMPLEIYELWENYPFLFGESICCFKIFLFETVCFASVLNVTVLSVERYIIVHILKTRYAIVNKHARRV 178
Nmur2_Dr d17  TPTNLYLFLRSSSATLRDASGNLRLIAKLPFLSLRREHLL 127

Nmur2_Hs      LGIVWGFVSLFSLPNTSIHGIKHFYFPNGSLVPGSATCTVIKPMWIYNFIIQVTSFLFYLLPMTVISVLYYLMALRLKDKSLEADEG- 254
Nmur2_Mm      LSLVWVSVFVSLPNTSIHGIKHQQFPNGSSVPGSATCTVIKPIWVYNFIIQVTSFLFYLLPMTIISVLYYLMCLRLKRDESLEADKV- 246
Nmur2_Dr      IAGVWAMSLICAVPNTSLHGLQCYLFE--RVQESATCNLLKPKWMYNLVICTITVLFYFVPMMLISVLYLMIGLTIIGRGQOKKDKLG 265
Nmur2_Dr d17  IAGVWAMSLICAVPNTSLHGLQCYLFE--RVQESATCNLLKPKWMYNLVICTITVLFYFVPMMLISVLYLMIGLTIIGRGQOKKDKLG 127

Nmur2_Hs      -----NANIQRPCRKSVNKMFLVVLVFAICWAPFHIDRLFFSFVEEWSLAAVFNLVHVSGVFFYLSSAVNPIIYNLLSRRFQ 335
Nmur2_Mm      -----TVNIRPSRKSVMKMLFVLVLFVFAICWIPFHVDRLFFSFVDEWIESLAAVFNLIHVVSGVFFYLSSAVNPIIYNLLSRRFR 327
Nmur2_Dr      SNHSNDSWKIHLDSRRRRQVTKMFEVVVLVFAICWAPFHIDRLVWSEFITSWTDHMHNIFEVYHIIISGVLFYLLSSAVNPIIYNLLSRRFR 354
Nmur2_Dr d17  SNHSNDSWKIHLDSRRRRQVTKMFEVVVLVFAICWAPFHIDRLVWSEFITSWTDHMHNIFEVYHIIISGVLFYLLSSAVNPIIYNLLSRRFR 127

Nmur2_Hs      AAFONVISSFHKOW-HSOHDPQLPPAORNIFLTECHFVELTEDIGPQFPCOSSMHNHSLPAALSSSEOMSRTNYQSFHFNKI 415
Nmur2_Mm      AAFRNVSFSPCK-WCHPQHRPCPPACKVIFLTECHLVELTEDAGPQFPCOSSHTNTQLTTVPCVEEVP 395
Nmur2_Dr      ERFQALVCSRLSTRS-SRND-SMFY--IIPK----DPPH-DFKRTG 392
Nmur2_Dr d17  ERFQALVCSRLSTRS-SRND-SMFY--IIPK----DPPH-DFKRTG 127
    
```

**H**

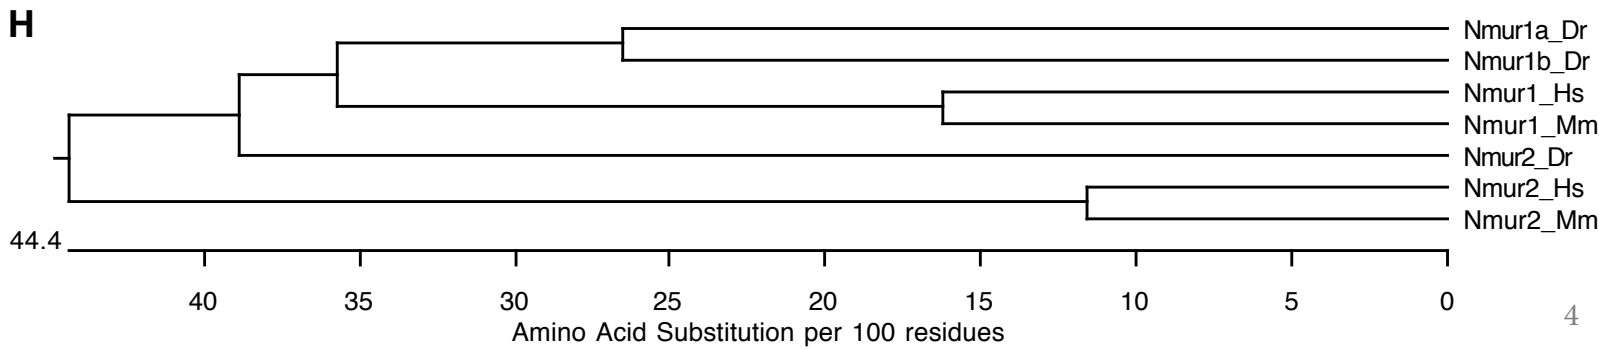

Figure S3

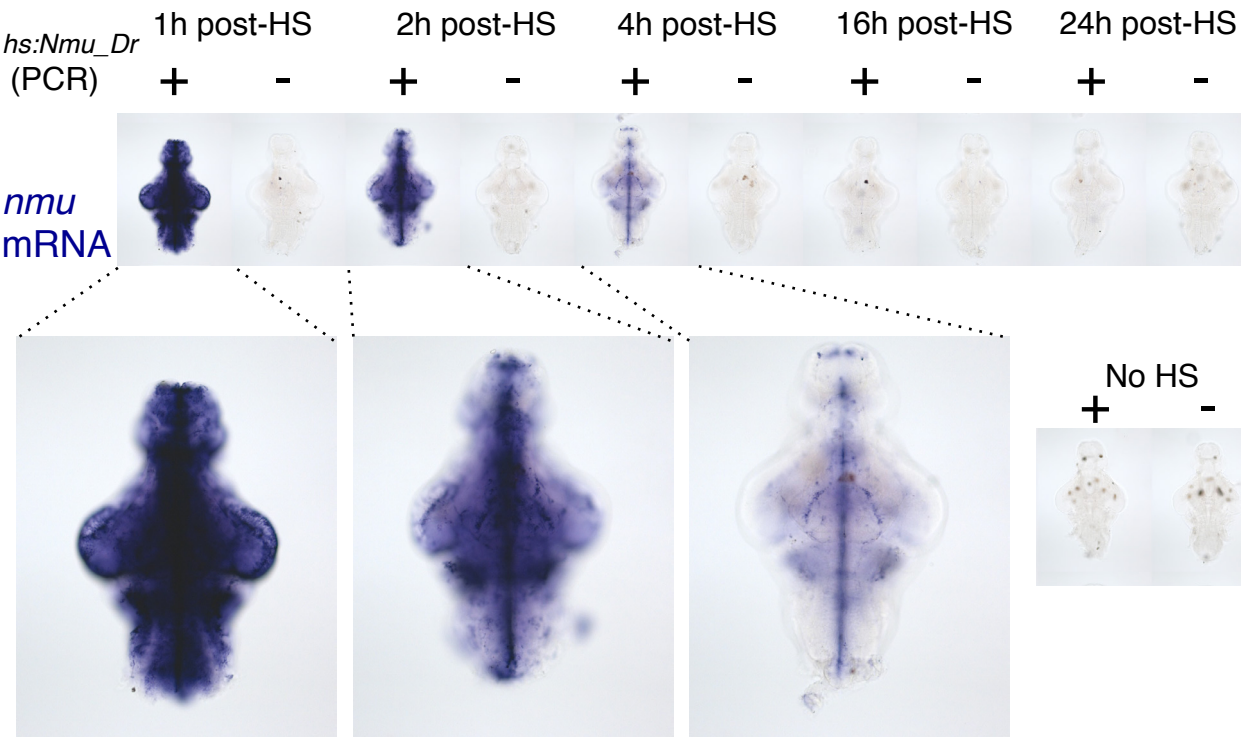

Figure S4

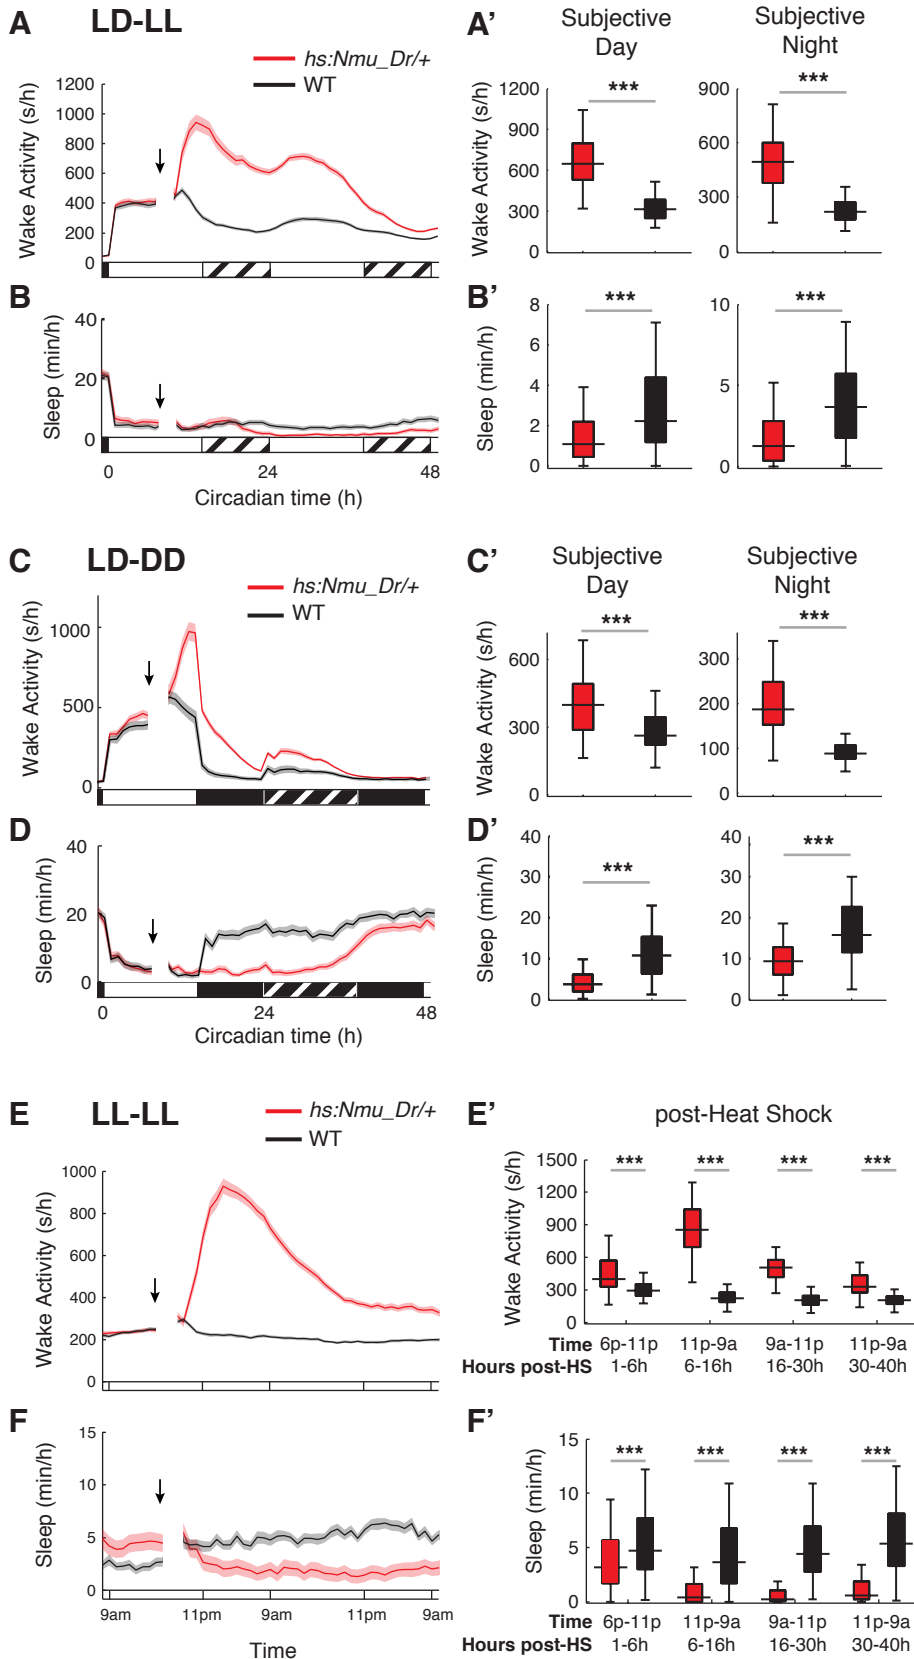

Figure S5

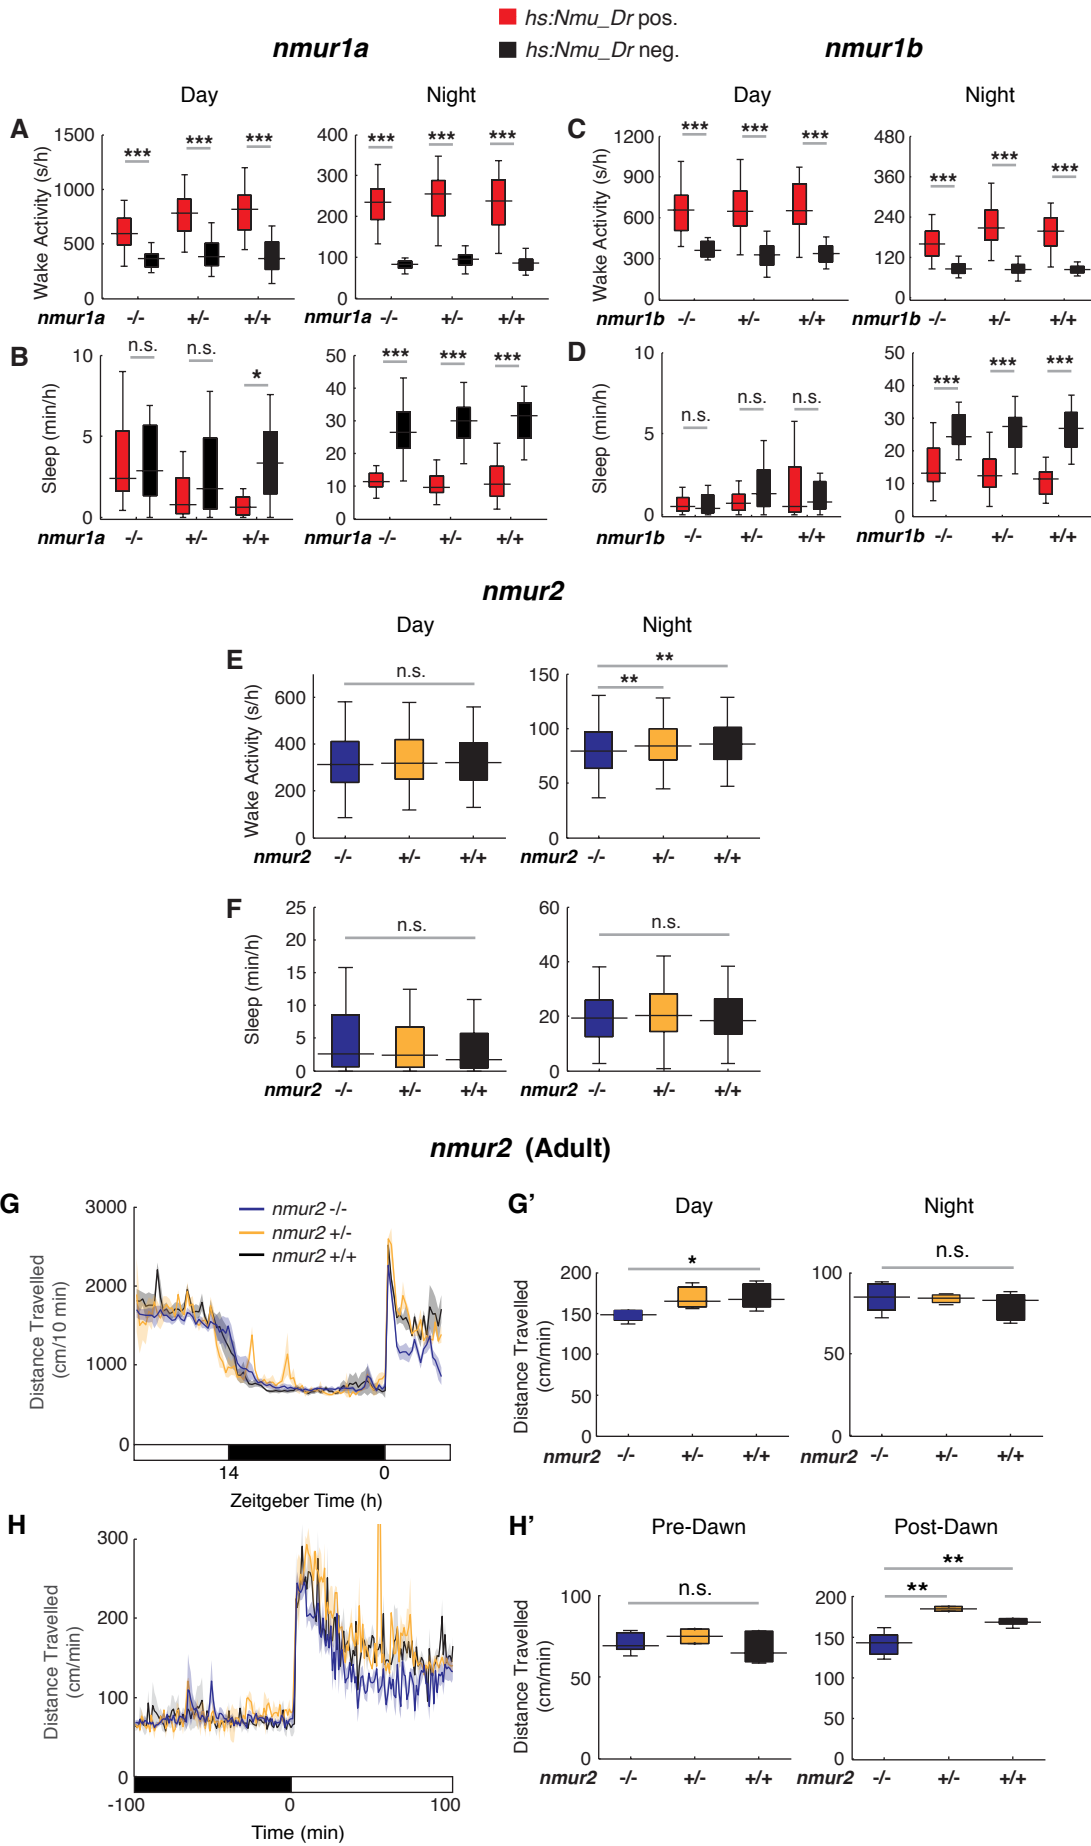



Figure S6

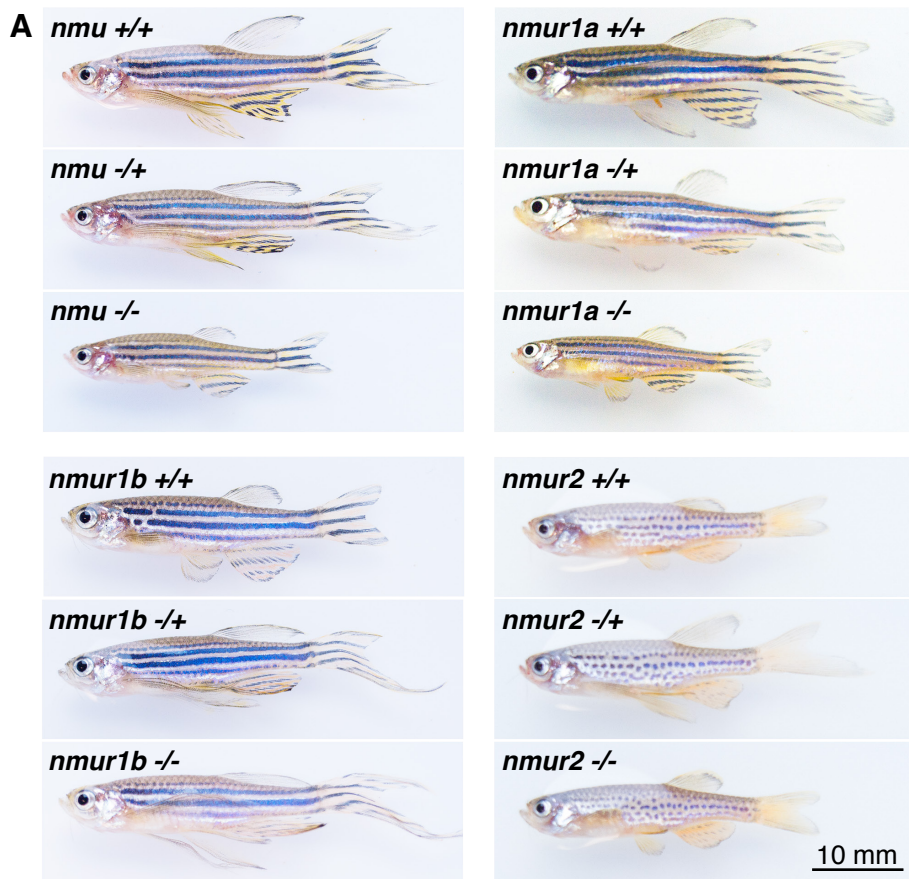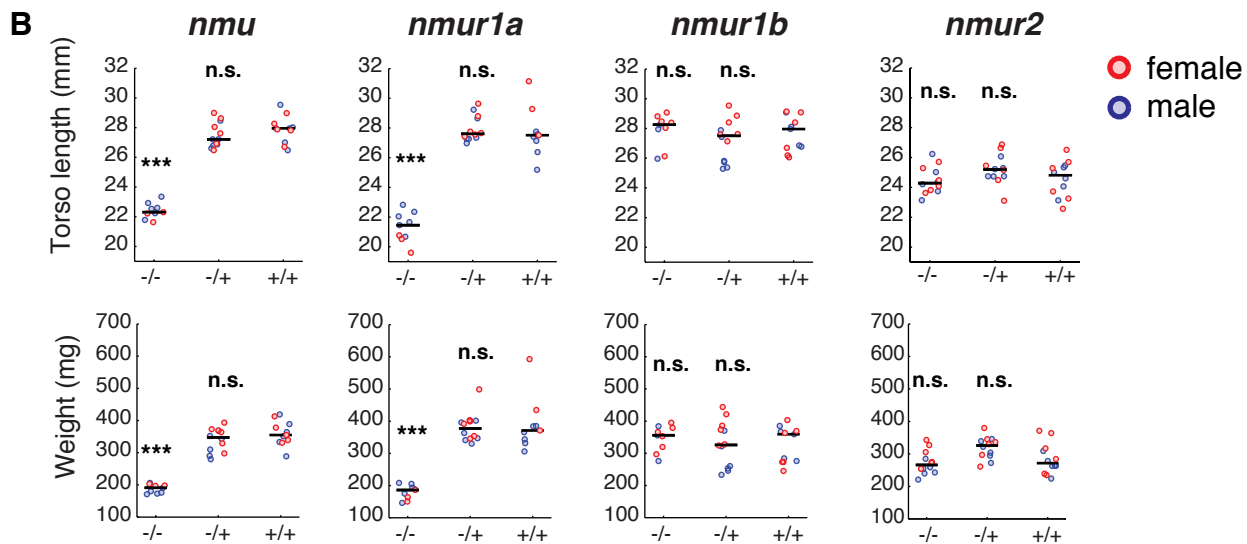



Table S1. Primary Screen

|                              |      |
|------------------------------|------|
| <b>Experiments Performed</b> | 1432 |
| <u>Unique ORFs</u>           | 1286 |
| <u>Unique Genes</u>          | 1126 |
| Duplicate ORFs               | 146  |
| Duplicate Genes              | 306  |

|                       |     |
|-----------------------|-----|
| <b>Controls</b>       | 768 |
| empty hs vector       | 660 |
| <u><i>hs:Hcrt</i></u> | 72  |
| <u><i>hs:EGFP</i></u> | 13  |

Table S2. Primary Screen Raw Data

|                              | <b>Screen Data</b><br>Mean +/- SD | <b>Control Data</b><br>Mean +/- SD |                |
|------------------------------|-----------------------------------|------------------------------------|----------------|
| Sleep (min/h)                | <b>Pre-HS</b>                     |                                    |                |
|                              | Night                             | 34.0 +/- 5.3                       | 34.9 +/- 5.3   |
|                              | Day                               | 18.1 +/- 5.6                       | 18.3 +/- 6.1   |
|                              | <b>Post-HS</b>                    |                                    |                |
|                              | Day 1                             | 15.7 +/- 4.7                       | 16.0 +/- 4.9   |
|                              | Night                             | 21.9 +/- 4.5                       | 23.0 +/- 4.5   |
| Day 2                        | 14.0 +/- 4.5                      | 14.7 +/- 4.9                       |                |
| Sleep Bouts (#/h)            | <b>Pre-HS</b>                     |                                    |                |
|                              | Night                             | 7.8 +/- 1.0                        | 7.8 +/- 1.02   |
|                              | Day                               | 4.71 +/- 1.1                       | 4.8 +/- 1.1    |
|                              | <b>Post-HS</b>                    |                                    |                |
|                              | Day 1                             | 3.9 +/- 0.9                        | 3.9 +/- 1.7    |
|                              | Night                             | 7.6 +/- 1.2                        | 7.7 +/- 1.2    |
| Day 2                        | 5.7 +/- 1.4                       | 6.1 +/- 1.5                        |                |
| Sleep Bout Length (min/bout) | <b>Pre-HS</b>                     |                                    |                |
|                              | Night                             | 4.9 +/- 1.6                        | 5.2 +/- 1.9    |
|                              | Day                               | 4.0 +/- 1.2                        | 4.0 +/- 1.5    |
|                              | <b>Post-HS</b>                    |                                    |                |
|                              | Day 1                             | 5.0 +/- 5.2                        | 4.9 +/- 2.8    |
|                              | Night                             | 3.0 +/- 0.9                        | 3.1 +/- 1.4    |
| Day 2                        | 2.4 +/- 1.2                       | 2.7 +/- 6.0                        |                |
| Sleep Latency (min)          | <b>Pre-HS</b>                     |                                    |                |
|                              | Night                             | 26.2 +/- 10.0                      | 25.4 +/- 10.6  |
|                              | Day                               | 54.6 +/- 32.6                      | 56.4 +/- 33.2  |
|                              | <b>Post-HS</b>                    |                                    |                |
|                              | Day 1                             | N/A                                | N/A            |
|                              | Night                             | 60.8 +/- 25.0                      | 55.2 +/- 24.4  |
| Day 2                        | 101.6 +/- 43.6                    | 99.0 +/- 52.0                      |                |
| Average Activity (s/h)       | <b>Pre-HS</b>                     |                                    |                |
|                              | Night                             | 48.4 +/- 12.5                      | 43.9 +/- 11.4  |
|                              | Day                               | 240.6 +/- 49.9                     | 218 +/- 47.9   |
|                              | <b>Post-HS</b>                    |                                    |                |
|                              | Day 1                             | 257.0 +/- 49.1                     | 230.8 +/- 47.0 |
|                              | Night                             | 66.2 +/- 15.1                      | 59.1 +/- 12.9  |
| Day 2                        | 213.5 +/- 43.3                    | 183.7 +/- 42.8                     |                |
| Wake Activity (s/h)          | <b>Pre-HS</b>                     |                                    |                |
|                              | Night                             | 108 +/- 18                         | 102 +/- 18     |
|                              | Day                               | 342 +/- 54                         | 312 +/- 54     |
|                              | <b>Post-HS</b>                    |                                    |                |
|                              | Day 1                             | 348 +/- 54                         | 312 +/- 48     |
|                              | Night                             | 102 +/- 18                         | 90 +/- 18      |
| Day 2                        | 270 +/- 42                        | 240 +/- 42                         |                |

Table S3. Secondary Screen

| <b><u>Experiments Conducted</u></b>                | <b>N</b>   |
|----------------------------------------------------|------------|
| <b><u>HS-Constructs Made into Stable Lines</u></b> | <b>60</b>  |
| Stable Repeats Primary Phenotype                   | 10         |
| Stable Differs from Primary                        | 2          |
| % Stables w/Phenotype                              | <b>20%</b> |
| <b><u>#Lines Tested/Construct</u></b>              |            |
| 1 line                                             | 22         |
| 2 lines                                            | 24         |
| 3 lines                                            | 14         |
| <b><u>Total Stable Experiments</u></b>             | <b>232</b> |
| Constructs Tested 1x                               | 9          |
| 2x                                                 | 13         |
| ≥3x                                                | 38         |

## Supplemental Figure Legends

### Figure S1. Screen-wide frequency distributions of sleep/wake behavioral parameters

**(Related to Figure 1).** (A-F) Histograms of behavioral indices from the primary screen, normalized as standard deviations from the mean (Z-score). Blue indicates the whole collection of experiments and red indicates the secondary selection of 60 Secretome genes that were chosen based on that parameter result. Most of the outliers with effects as strong as *Nmu* that were not chosen had failed to reproduce in repeated transient injection tests. See Figure 1, Table S2, and Supplemental Experimental Procedures for additional information about how the parameters and indices were calculated.

### Figure S2. Sequences of wild type and mutant *Nmu*, *Nmur1* and *Nmur2* (Related to Figure

**2).** Nucleotide sequences of open reading frames of zebrafish wild type and mutant *nmu* (A, ENSDARG00000043299), *nmur1a* (C, ENSDARG00000060884), *nmur1b* (D, ENSDARG00000003944) and *nmur2* (F, ENSDARG00000022570) are shown. Zebrafish orthologs were identified by reciprocal Blast searches of mammalian and zebrafish genomes. Red boxes indicate binding sites of ZFNs (C, D) and TALENs (A, F) used to generate mutants. Alignments of amino acid sequences of human, mouse, wild type zebrafish and mutant zebrafish *Nmu* (B; human, ENSG00000109255; mouse, ENSMUSG00000029236), *Nmur1* (E; human, ENSG00000171596; mouse, ENSMUSG00000026237) and *Nmur2* (G; human, ENSG00000132911; mouse, ENSMUSG00000037393) are shown. Amino acids shaded in black are identical to human. Blue lines indicate mature human *Nmu* peptide (B) and predicted human *Nmur* transmembrane domains (E, G). Asterisks in (B) indicate conserved residues that are critical for biological activity in mammals. H. Phylogenetic tree of human, mouse and zebrafish *Nmu* receptors.

**Figure S3. Time course of Nmu overexpression (Related to Figure 3).** Larvae from a *hs:Nmu\_Dr* /+ to WT mating were heat shocked for 1 hour at 37°C at 5 dpf and fixed at the indicated times after heat shock. ISH was then performed using an *nmu*-specific riboprobe on dissected larval brains. Transgenic and WT larvae were subsequently identified by PCR. Ubiquitous *nmu* overexpression was observed at 1 hour post-heat shock, with reduced levels at 2 and 4 hours post-heat shock. No ectopic transcript was observed at 16 and 24 hours post-heat shock. No ectopic *nmu* expression was observed in non-heat shocked transgenic brains (No HS, insert). Chromogenic development was stopped at the same time for all samples prior to the visualization of endogenous *nmu* transcript. While this data shows that ectopic *nmu* transcript levels are ubiquitously elevated for a few hours after heat shock, the perdurance of Nmu peptide is not known.

**Figure S4. Nmu overexpression phenotypes persist in the absence of circadian cues (Related to Figure 3).** Nmu overexpression increases wake activity (A, A') and decreases sleep (B, B') in larvae entrained to LD and switched to constant light (LD-LL) conditions. Hatched boxes in the x-axis indicate subjective night. Nmu overexpression increases wake activity (C, C') and decreases sleep (D, D') in larvae entrained to LD and switched to constant dark conditions (LD-DD). Hatched boxes in x-axis indicate subjective day. (E, F) Larvae raised in constant light from birth (LL-LL) do not exhibit a circadian wake activity or sleep rhythms, and Nmu-induced phenotypes persist in the absence of entrained or external circadian cues. Number of subjects: (A, B) *hs:Nmu*/+ (n=98), WT (n=92). (C, D) *hs:Nmu*/+ (n=90), WT (n=98). (E, F) *hs:Nmu*/+ (n=92), WT (n=98). \*\*\*p<0.001, Mann-Whitney U-test.

**Figure S5. Larval *nmur* receptor mutants lack sleep/wake phenotypes and Nmu-induced hyperactivity and insomnia do not require *nmur1a* or *nmur1b* (Related to Figure 5).** Larvae with homozygous and heterozygous mutations of *nmur1a* (A, B) or *nmur1b* (C, D) respond to Nmu overexpression, indicating that these receptors are not required for *hs:Nmu*-induced phenotypes. For *hs:Nmu/+* neg. larvae, all comparisons between *nmur1a*<sup>-/-</sup>, *nmur1a*<sup>+/-</sup> and *nmur1a*<sup>+/+</sup> siblings, and between *nmur1b*<sup>-/-</sup>, *nmur1b*<sup>+/-</sup> and *nmur1b*<sup>+/+</sup> siblings, were not significantly different. *nmur2*<sup>-/-</sup> larvae exhibit slightly less wake activity at night compared to *nmur2*<sup>+/-</sup> and *nmur2*<sup>+/+</sup> siblings (E), but there is no significant difference in wake activity during the day (E) or in sleep (F) among the three genotypes. Two month old *nmur2*<sup>-/-</sup> adults exhibit reduced activity compared to their *nmur2*<sup>+/-</sup> and *nmur2*<sup>+/+</sup> siblings during the day (G, G') and following night to day transitions (H, H'). Data in adult line graphs are averaged in 10 (G) or 1 (H) minute bins. Adult animals were derived from a *nmur2*<sup>+/-</sup> to *nmur2*<sup>+/-</sup> mating. Number of subjects for *nmur1a* mutant experiment: *hs:Nmu/+; nmur1a*<sup>-/-</sup> (n=22), *hs:Nmu/+; nmur1a*<sup>+/-</sup> (n=9), *hs:Nmu/+; nmur1a*<sup>+/+</sup> (n=22), *nmur1a*<sup>-/-</sup> (n=23), *nmur1a*<sup>+/-</sup> (n=54), *nmur1a*<sup>+/+</sup> (n=18). Number of subjects for *nmur1b* mutant experiment: *hs:Nmu/+; nmur1b*<sup>-/-</sup> (n=29), *hs:Nmu/+; nmur1b*<sup>+/-</sup> (n=43), *hs:Nmu/+; nmur1b*<sup>+/+</sup> (n=25), *nmur1b*<sup>-/-</sup> (n=22), *nmur1b*<sup>+/-</sup> (n=39), *nmur1b*<sup>+/+</sup> (n=17). Number of subjects for *nmur2* mutant larval experiment: *nmur2*<sup>-/-</sup> (n=106), *nmur2*<sup>+/-</sup> (n=233), *nmur2*<sup>+/+</sup> (n=108). Number of subjects for *nmur2* mutant adult experiment: *nmur2*<sup>-/-</sup> (n=8), *nmur2*<sup>+/-</sup> (n=3), *nmur2*<sup>+/+</sup> (n=5). \*p<0.05, \*\*p<0.01, \*\*\*p<0.001, n.s. p>0.05, Kruskal-Wallis test followed by the Steel-Dwass test for pairwise multiple comparisons.

**Figure S6. *nmur*<sup>-/-</sup> and *nmur1a*<sup>-/-</sup> but not *nmur1b*<sup>-/-</sup> or *nmur2*<sup>-/-</sup> adult zebrafish exhibit defects in size and weight (Related to Figure 5).** (A) Representative images of male 20-22 week old adults from each genotype tested. For each mutation, fish from heterozygous mutant matings

were raised to adulthood, measured and then genotyped to identify homozygous mutant, heterozygous mutant and WT individuals. All samples are displayed at the same scale (scale bar = 10 mm). (B) Size, as measured from rostral tip to end of torso (fin length not included), and weight of individual fish. Red=female, blue=male. Black horizontal bars indicate median value for each genotype. \*\*\* $p < 0.001$ , n.s.  $p > 0.05$ , Kruskal-Wallis test followed by the Steel-Dwass test for pairwise multiple comparisons.

**Table S1. Primary screen summary data (Related to Figure 1).** This table shows a summary of the experiments performed in the primary screen. Fewer unique genes were tested than unique ORFs because some genes contained splice variants that encode for more than one ORF. Duplicate ORFs and duplicate genes refer to the number of unique ORFs and unique genes that were tested more than once. Empty hs vector denotes negative control consisting of the Gateway destination vector that was not recombined to insert an ORF 3' to the heat shock promoter. *hs:Hcrt* denotes positive control containing the zebrafish Hcrt ORF. *hs:EGFP* denotes negative control containing the EGFP ORF. Most experiments used the empty hs vector as a negative control.

**Table S2. Primary screen raw data (Related to Figure 1).** This table shows mean $\pm$ standard deviation values of all behavioral parameters quantified in the primary screen during day and night periods before and after heat shock. Data for overexpressed ORFs (Screen Data) and negative controls (Control Data) are shown. Most overexpressed ORFs did not induce phenotypes, so Screen Data and Control Data values are similar.

**Table S3. Secondary screen summary data (Related to Figure 1).** This table shows summary statistics for the 60 human ORFs for which stable transgenic lines were generated. Of the 60



ORFs, 10 produced overexpression phenotypes similar to those observed in the primary screen. Two ORFs produced overexpression phenotypes different from those observed in the primary screen. Two or three independent stable transgenic lines were generated for 24 or 14 of the ORFs, respectively. Most stable transgenic lines were tested for overexpression phenotypes in 3 or more independent behavioral experiments.

**Movie S1. *nmu* expression in a 5 dpf larval zebrafish brain (Related to Figure 2).** At 5 dpf, *nmu* is expressed in several ventral hypothalamic cell clusters, a dorsal hypothalamic bilateral cluster, and a few cells in the lateral-caudal brainstem. The movie progresses from ventral to dorsal focal planes imaged at 5  $\mu\text{m}$  intervals. The large dark spots in the most dorsal images are pigment cells.

**Movie S2. *nmur2* expression in a 5 dpf larval zebrafish brain (Related to Figure 2).** At 5 dpf, *nmur2* is broadly expressed in discrete regions of the brain, including cell clusters in the brainstem, hypothalamus and forebrain. The movie progresses from ventral to dorsal focal planes imaged at 5  $\mu\text{m}$  intervals. The large dark spots in the most dorsal images are pigment cells.

## **Supplemental Experimental Procedures**

### **Animal use**

Zebrafish were raised on a 14 hour:10 hour light:dark cycle at 28.5°C, with lights on at 9 a.m. and off at 11 p.m. WT, transgenic, and mutant stocks come from a background of TL x AB WT strains. All experiments with zebrafish followed standard protocols (Westerfield, 2000) in accordance with the Harvard University and California Institute of Technology Institutional Animal Care and Use Committee guidelines.

### **Generation of Secretome library and microinjection assay**

The LOCATE database (<http://locate.imb.uq.edu.au>) identifies 4418 human proteins that are predicted or known to be secreted. ORFs that encode 1632 of these proteins were present in the hORFeome 3.1 collection in Gateway entry vectors (Lamesch et al., 2007). We constructed a Gateway destination vector containing a heat shock-inducible promoter (Halloran et al., 2000) 5' to attR1 and an SV40 polyadenylation signal 3' to attR2, and the entire cassette was flanked by Tol2 transposase arms. LR clonase (Invitrogen) was used to transfer each ORF into the destination vector. Plasmid preps were obtained using a Qiagen Biorobot 8000, purified using multiscreen PCR  $\mu$ 96 filter plates (LSKMPCR10, Millipore), dried using a speedvac, and dissolved in 10  $\mu$ L water. Plasmid concentrations were measured using the Quant-iT kit (Invitrogen) and adjusted to 100 ng/ $\mu$ L. The purification step allowed injection of twice as much DNA compared to non-purified samples without increased toxicity. One nL of an injection mix (50 ng/ $\mu$ L plasmid, 150 ng/ $\mu$ L *tol2 transposase* mRNA and 0.05% phenol red in PBS (P0290, Sigma-Aldrich)) was injected into the yolk of TLAB embryos at the one-cell stage. Each plasmid was injected into 50 embryos, and up to 32 larvae were tested in the behavioral assay. Injected animals were screened at 24 hpf and immediately prior to the behavioral assay to remove any larvae that exhibited

abnormal morphology or locomotor behaviors. Plasmids for which fewer than 24 healthy larvae were available to test were reinjected at 25 ng/ $\mu$ L. For behavioral testing, individual larvae were placed into each of 80 wells of a 96-well plate (7701-1651, Whatman) containing 650  $\mu$ L embryo water (0.3 g/L Instant Ocean, 1 mg/L methylene blue, pH 7.0). Two plasmids were tested in each plate on 32 animals per plasmid. At 4 dpf, larvae injected with each plasmid were loaded in alternating columns, and control larvae injected with the destination vector lacking an ORF or containing EGFP were loaded in columns 1 and 10.

After the primary screen, post-HS day and night sleep, wake activity, and sleep bout number, length and latency were calculated for each clone tested as described (Rihel et al., 2010): sleep is defined as one minute of inactivity; sleep bouts are the number of uninterrupted runs of sleep; sleep length is the average time a sleep bout lasts; sleep latency is the time from lights out to first sleep bout; and wake activity is the amount of locomotor activity during active bouts. The activity index was determined as:

$$\text{Activity Index} = \frac{(\text{PostNight}_n - \text{PreNight}_n) + 0.5(\text{PostD1}_n + \text{PostD2}_n) - \text{PreDay}_n}{1/N \sum (\text{PostNight}_c - \text{PreNight}_c + 0.5(\text{PostD1}_c + \text{PostD2}_c) - \text{PreDay}_c)}$$

Z-scores were determined by subtracting the mean of all tested clones from the measure of each clone, divided by the standard deviation of all tested clones.

### **Secondary screening in stable transgenic lines**

Sixty clones that produced the same phenotype upon retesting in the injection overexpression assay were used to generate stable transgenic lines using Tol2 transposase or ISce1 meganuclease. Stable lines were identified by heat shocking the progeny of potential founders at 24 hpf, fixing the embryos with 4% paraformaldehyde (PFA) in phosphate buffered saline (PBS) 1 hour after

heat shock, and performing ISH using a probe specific for the overexpressed ORF. Lines that produced strong and ubiquitous gene overexpression were used for behavioral assays. When available, up to three independent stable lines were behaviorally tested for each ORF (Table S3) in the locomotor activity assay.

### **Locomotor activity assay**

At 4 dpf, individual larvae were placed into each 650  $\mu$ L well of a 96-well plate (7701-1651, Whatman). For the primary screen, only 80 wells of the plate were used due to software and hardware limitations. For subsequent experiments, all 96 wells were used. In experiments using stable transgenic or mutant lines, larvae were blindly assigned a position in the plate, and were genotyped after the behavioral experiment was completed. Except in the primary screen or as noted, plates were filled E3 embryo medium and sealed with an optical adhesive film (4311971, Applied Biosystems) to prevent evaporation. Occasionally, the sealing process introduces air bubbles in some wells, which occlude tracking of larvae and are discarded from analysis. Locomotor activity was monitored using an automated videotracking system (Viewpoint Life Sciences) with a one-third inch monochrome camera (primary screen: LTC0385, Bosch; subsequent experiments: Dragonfly 2, Point Grey) fitted with a fixed-angle megapixel lens (M5018-MP, Computar) and infrared filter. Larvae were heat shocked at 37°C for one hour starting around 4 p.m. or 5 p.m. on 5 or 6 dpf. The movement of each larva was captured at 15 Hz and recorded using the quantization mode with 1-minute integration time bins. In the primary screen, data from two cameras were collected in alternating minutes by one computer; in subsequent experiments, one computer collected data from two cameras simultaneously. The 96-well plate and camera were housed inside a custom-modified, opaque Zebrabox (Viewpoint Life Sciences) that was continuously illuminated with infrared LEDs, and illuminated with white LEDs

from 9 a.m. to 11 p.m., except as noted in constant light or constant dark experiments. The 96-well plate was housed in a chamber filled with recirculating water to maintain a constant temperature of 28.5°C. The parameters used for detection with the Bosch (primary screen) / Point Grey (subsequent experiments) cameras were the following: detection threshold, 40/14; burst, 25/29; freeze, 3/4. Data were processed using custom PERL and Matlab (The Mathworks, Inc) scripts.

For adult behavioral assays, individual two month (*nmur2* mutant) or three month (*nmu* mutant) old zebrafish were randomly placed into a 7 cm x 12 cm by X 8.5 cm (WxLxH) open topped, transparent plastic chamber, with three small holes (5 mm, partially covered with parafilm for smaller adults) to allow water exchange. The chambers (8 per tracking session) were placed into a semi-transparent, plastic 46 cm x 54 cm chamber, which was supplied with aquarium fish water (water height in chamber: 4.5 cm), pumped from a 45 L reservoir with an aquarium pump (Maxi-Jet, MJ500) at a flow rate of 1.3 L/min and heated to 28°C with an aquarium heater (HT100; Tetra). The chamber was continuously illuminated from below with two panels of infrared lights (60 Degree, 54 LED Video Camera Red Infrared Illuminator Lamp, SourcingMap) with the detector covered, and illuminated from above with white light (180 lux at water surface) from 9 a.m. to 11 p.m. The chambers were monitored with a ceiling mounted (143 cm from chamber to lens) Dinion one-third inch Monochrome camera (LTC0385; Bosch) fitted with a 13-36 mm, 1:2.8, 2/3" lens (Computar). The entire setup was housed in an isolated darkroom. Fish were continuously tracked for two to four days at 15 Hz using an automated videotracking system (Viewpoint Life Sciences) in tracking mode, with a background threshold of 40, inactive/small movement cutoff of 1.3 cm/sec, and small/large movement cutoff of 8 cm/sec. Each track was visually inspected at 1 minute resolution for any artifactual movements (e.g. from stray particles or air bubbles) and then analyzed using custom Matlab scripts (The Mathworks, Inc). Fish were

derived from a *nmu*<sup>-/-</sup> to *nmu*<sup>+/-</sup> mating and a *nmur2*<sup>+/-</sup> to *nmur2*<sup>+/-</sup> mating. Mixed gender siblings were raised in groups of 30-40 per tank and were genotyped by fin clip after the behavioral assay.

### **Light pulse-evoked arousal assay**

Larval zebrafish were housed and monitored as described for the locomotor assay, except activity was stored in 1-second integration time bins and data were subsequently smoothed with a 10-second running average. One-minute light pulse trials were presented at 2 hour intervals starting 2 hours after the start of the dark phase (i.e. 1 a.m.). The full dataset consisted of 870 trials each for *hs:Nmu*<sup>+/+</sup> and WT sibling genotypes, which were randomly subdivided to generate n=29 samples per genotype, with each sample representing a 30-trial average. The baseline for each sample was measured as the median activity level during the 30 minutes prior to stimulus onset. The peak amplitude ( $A_1$ ) during first “stimulus-on” response epoch was defined as the peak raw activity level during the stimulus period minus the sample baseline. The peak amplitude ( $A_2$ ) of the “post-stimulus” response epoch was determined in two steps. First, an alpha function was fit to the “post-stimulus” response, as given in Equation 1:

$$\text{Eq. 1: } y(t) = \text{baseline} + t * e^{-(t/\tau)}$$

with time  $t$ , and free decay parameter  $\tau_{\text{decay}}$ . Second, the  $A_2$  was calculated as peak value of the alpha curve fit minus baseline. Next, the exponential decay function that was fit to the “stimulus-on” or “post-stimulus” epochs of the response curve is given in Equation 2:

$$\text{Eq. 2: } y(t) = \text{baseline} + A * e^{-(t/\tau)}$$

with time  $t$ , peak amplitude  $A_1$  or  $A_2$ , and free decay parameter  $\tau_1$  or  $\tau_2$ , for the “stimulus-on” and post-stimulus response periods, respectively. Total activity for “stimulus-on” was calculated as the integral of raw activity ( $\int \text{Activity}_1$ ) data during the 6 minutes after stimulus onset. Total activity

for “post-stimulus” response was calculated as the integral of raw activity ( $\int \text{Activity}_2$ ) during subsequent time points through  $\tau_2$ .

### **Generation of zebrafish heat-shock inducible transgenic lines**

We used reciprocal BLAST to identify zebrafish orthologs for each human ORF that produced a locomotor activity phenotype in stable transgenic lines. To clone the zebrafish ORFs, we performed RT-PCR (Superscript III Reverse Transcriptase, Life Technologies) using mRNA isolated from 5 dpf zebrafish larvae (Trizol, Life Technologies). In cases where the 5' or 3' end of an ORF was not annotated in Ensembl or was ambiguous, 5' and 3' RACE (First Choice RLM-RACE Kit, Life Technologies) was performed to identify the entire ORF. Each ORF was cloned into a vector containing a heat-shock inducible promoter (Halloran et al., 2000) and ISceI meganuclease sites, and each vector was injected with ISceI (New England Biolabs) into zebrafish embryos at the one-cell stage to generate stable lines, which were identified as described above.

### **Generation of zebrafish mutants**

*nmu* and *nmur2* mutant zebrafish were generated using TAL effector nucleases (TALENs), as described (Chen et al., 2013; Reyon et al., 2012). *nmur1a* and *nmur1b* mutant zebrafish were generated using zinc finger nucleases (ZFNs), as described (Chen et al., 2013). Plasmids were obtained from Addgene. *nmu* mutants were genotyped using the primers 5'-TGACCGACAGAGAGCATGAG-3', 5'-GGAGTAGTACCGCGAGCATC-3' and 5'-CGATTAAAACAGTAAAACGCAGA-3', which generate 172 bp and 106 bp bands for the WT allele and a 168 bp band for the mutant allele. *nmur1a* mutants were genotyped using the primers 5'-AGACACCCTGTATTTTCTCCTCA-3', 5'-GTAGAGGACGGGGTTTATGG-3' and 5'-CACATCGGAGCTAGCGAAAC-3', which generate a 203 bp band for the WT allele, and 214 bp



and 96 bp bands for the mutant allele. *nmur1b* mutants were genotyped using the primers 5'-TCAATGATACAGTACAACCTGCTCCTC-3', 5'-AGGGTCCAAGGTATTTCTCCA-3' and 5'-ATGGTGCTCCACCAAAGAA-3', which generate 163 bp and 101 bp bands for the WT allele and a 158 bp band for the mutant allele. *nmur2* mutants were genotyped using the primers 5'-ATGACCGGGTCTTAGGAAA-3' and 5'-TGACGTTTAACACGGAAGCA-3', which generate a 244 bp band for the WT allele and a 227 bp band for the mutant allele. The *gr<sup>s357</sup>* mutant (Ziv et al., 2013) and was a kind gift from Herwig Baier. These animals were genotyped using the primers 5'-GGAAGAACTGaCCTGCCTGT-3' and 5'-TCTCAGTTTATCCACATTTATGCAG-3'. DrdI digests the WT PCR product into 114 and 14 bp bands.

### ***in situ* hybridization and imaging**

Samples were fixed in 4% PFA in PBS for 12-16 hours at room temperature. *in situ* hybridizations (ISH) were performed using digoxigenin (DIG) labeled antisense riboprobes (DIG RNA Labeling Kit, Roche) or 2,4-dinitrophenol (DNP) labeled antisense riboprobes (DNP-11-UTP, Perkin Elmer) as previously described (Thisse and Thisse, 2008). Double-fluorescent ISH was performed using DIG- and DNP- labeled riboprobes and the TSA Plus Fluorescein and Cyanine 3 Systems (Perkin Elmer). PCR products generated from larval zebrafish cDNA were used as templates for riboprobe synthesis using the following primers. *nmu*: 5'-CATGAGGAACAGCAATCAATG-3' and 5'-TAATACGACTCACTATAGGGACACATACTCATCAGATCTTCTTCC-3' (524 bp). *nmur1a*: 5'-GGCATTAAACCTCACCGAGA-3' and 5'-TAATACGACTCACTATAGGGCACGTTTCGTCAAGAAATCAAA-3' (1620 bp). *nmur1b*: 5'-GTGAACACGTCATGGTGCTC-3' and 5'-TAATACGACTCACTATAGGGGCGTTGGTATTCAGAAACTGC-3' (1206 bp). *nmur2*: 5'-

CTCCTGACCTGCGCTGTAAT-3' and 5'-  
TAATACGACTCACTATAGGGGAGGAGCTGAACTTGACTTGC-3' (1486 bp). Plasmids containing *crh* (genbank clone CK352624, 849 bp) and *cfos* (genbank clone CA787334, 870 bp) expressed sequence tags were also used for riboprobe synthesis.

Samples were coverslip mounted in 80% glycerol in PBS and imaged using a compound microscope (Axioimager with EC Plan-Neofluar 10x/0.30 NA Air or Plan-Apochromat 20x/0.8 NA Air objective, Carl Zeiss MicroImaging, Inc.) for chromogenic ISH samples, or for double fluorescent ISH samples, a confocal microscope (LSM 780 with a Plan-Apochromat 10x/0.45 NA Air or LD C-Apochromat 40x/1.1 NA Water objective, Carl Zeiss MicroImaging, Inc.). Fluorescein and Cyanine were imaged in separate channels with a 488 nm or 561 nm laser, respectively. Confocal images are displayed as the maximum intensity z-projection of a stack of optical sections of approximately 1 airy unit (A.U.) thickness and 0.5 A.U. spacing.

### **Drug treatment**

A 20 mM stock of 5-Chloro-*N*-(cyclopropylmethyl)-2-methyl-*N*-propyl-*N'*-(2,4,6-trichlorophenyl)-4,6-pyrimidinediamine hydrochloride (NBI 27914, Cat#1591, Tocris) was freshly prepared in dimethyl sulfoxide (DMSO) just prior to drug treatment. Immediately after the 37°C heat shock treatment from noon to 1 p.m. on 5 dpf, drug and vehicle were loaded into alternating columns of an open (i.e. not sealed) 96-well plate to make a final working concentration of 5  $\mu$ M NBI 27914 in 0.05% DMSO, or 0.05% DMSO (vehicle only) in E3 embryo medium. Separate experiments were performed with the same procedure as above at 2  $\mu$ M or 0.5  $\mu$ M NBI 27914 in 0.05% DMSO and included within-experiment, vehicle only controls. For the dose-response graph, post-HS Day waking activity data across separate experiments (i.e. different drug

concentrations and controls) were normalized to within-experiment, vehicle-only controls before being pooled for analysis.

### **Weight and size measurements of adult zebrafish**

Samples were generated from heterozygous x heterozygous mutant crosses for each mutation. To match environmental conditions across genotypes, sibling fish were raised in genotype-intermixed tanks (6 per 1.8 L tank) at 28.5°C until measurement at 20-22 weeks post fertilization. Thus, phenotypes for each mutation were compared across age- and housing-matched siblings. Fish were briefly anesthetized with tricaine, photographed, then blotted and weighed. Torso length was measured as the linear distance between the rostral tip to the end of the trunk, not including the tail fin. Each fish was then genotyped by fin clip and PCR as described above. Up to 6 each of males and females were measured for each genotype.

## Supplemental References

- Chen, S., Oikonomou, G., Chiu, C.N., Niles, B.J., Liu, J., Lee, D.A., Antoshechkin, I., and Prober, D.A. (2013). A large-scale in vivo analysis reveals that TALENs are significantly more mutagenic than ZFNs generated using context-dependent assembly. *Nucleic Acids Res* *41*, 2769-2778.
- Halloran, M.C., Sato-Maeda, M., Warren, J.T., Su, F., Lele, Z., Krone, P.H., Kuwada, J.Y., and Shoji, W. (2000). Laser-induced gene expression in specific cells of transgenic zebrafish. *Development* *127*, 1953-1960.
- Lamesch, P., Li, N., Milstein, S., Fan, C., Hao, T., Szabo, G., Hu, Z., Venkatesan, K., Bethel, G., Martin, P., *et al.* (2007). hORFeome v3.1: a resource of human open reading frames representing over 10,000 human genes. *Genomics* *89*, 307-315.
- Reyon, D., Khayter, C., Regan, M.R., Joung, J.K., and Sander, J.D. (2012). Engineering designer transcription activator-like effector nucleases (TALENs) by REAL or REAL-Fast assembly. *Curr Protoc Mol Biol Chapter 12*, Unit 12 15.
- Rihel, J., Prober, D.A., Arvanites, A., Lam, K., Zimmerman, S., Jang, S., Haggarty, S.J., Kokel, D., Rubin, L.L., Peterson, R.T., *et al.* (2010). Zebrafish behavioral profiling links drugs to biological targets and rest/wake regulation. *Science* *327*, 348-351.
- Thisse, C., and Thisse, B. (2008). High-resolution in situ hybridization to whole-mount zebrafish embryos. *Nat Protoc* *3*, 59-69.
- Westerfield, M. (2000). *The zebrafish book. A guide for the laboratory use of zebrafish (Danio rerio)*. 4th Edition. (Univ. of Oregon Press, Eugene).
- Ziv, L., Muto, A., Schoonheim, P.J., Meijnsing, S.H., Strasser, D., Ingraham, H.A., Schaaf, M.J., Yamamoto, K.R., and Baier, H. (2013). An affective disorder in zebrafish with mutation of the glucocorticoid receptor. *Molecular psychiatry* *18*, 681-691.
